# Supplementary material for: Contribution of epigenetic landscapes and transcription factors to X-chromosome reactivation in the inner cell mass
Source: PubMed Central journal article supplement (PMC5670228; doi:10.1038/s41467-017-01415-5), 2017-11-03
Supplement: 41467_2017_1415_MOESM1_ESM.pdf [file 41467_2017_1415_MOESM1_ESM.pdf]

Centromere

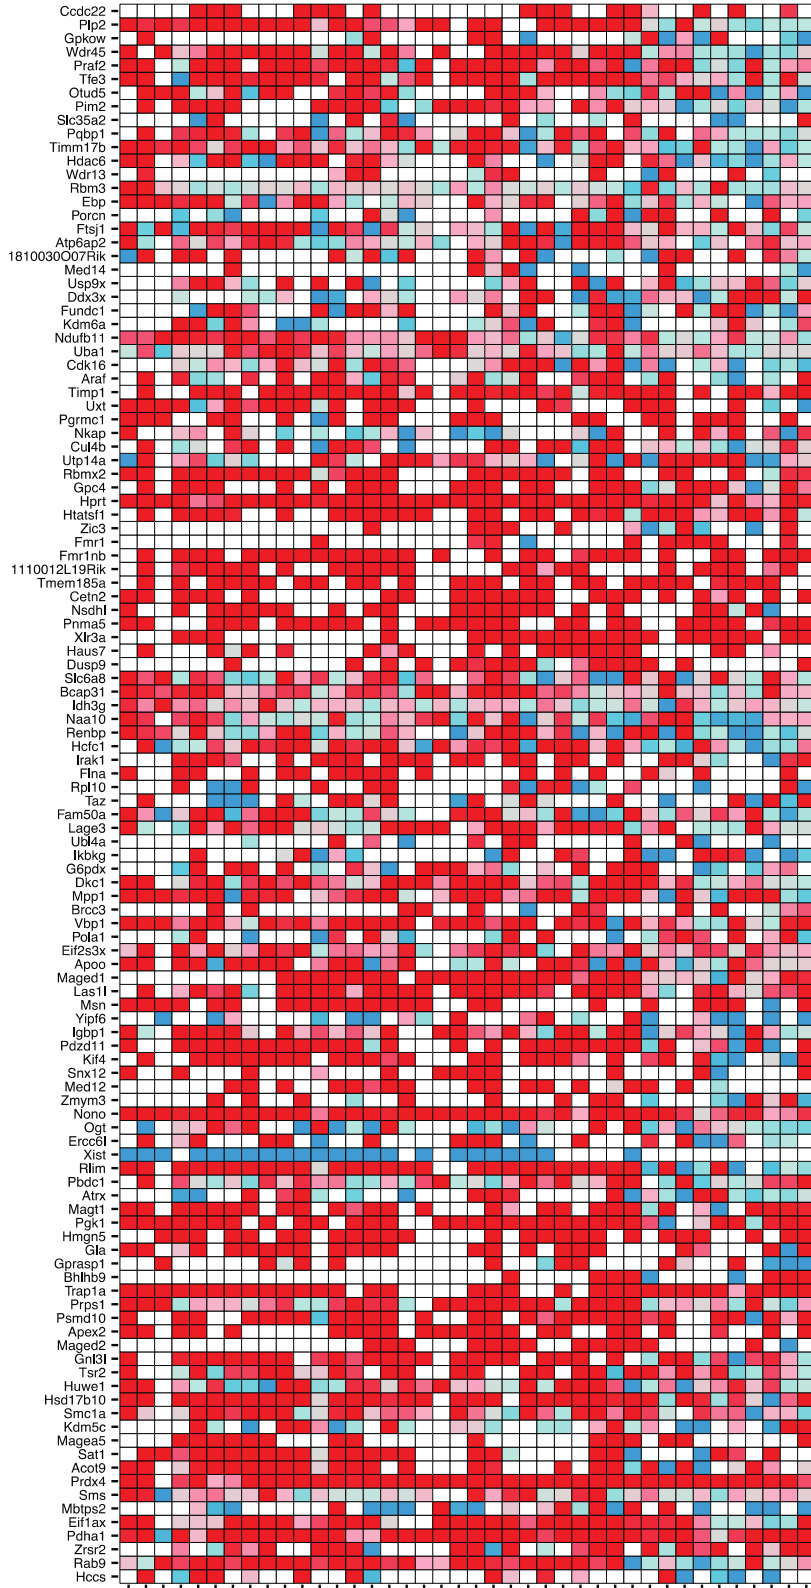

Telomere

n=116 genes

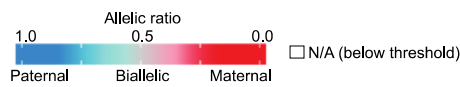

### **Supplementary Figure 1 (related to Figure 4)**

Heatmap representing the allele-specific expression of informative and well expressed X-linked genes in each single cell, in E3.5 (Trophectoderm and ICM) and E4.0 (Primitive Endoderm and Epiblast) female hybrid embryos (B6 x Castaneus cross). Strictly maternally expressed genes (allelic ratio  $\leq 0.15$ ) are represented in red and strictly paternally expressed genes (allelic ratio  $\geq 0.85$ ) in blue. Colour gradients are used in between and genes have been ordered by genomic position. n=116 genes.

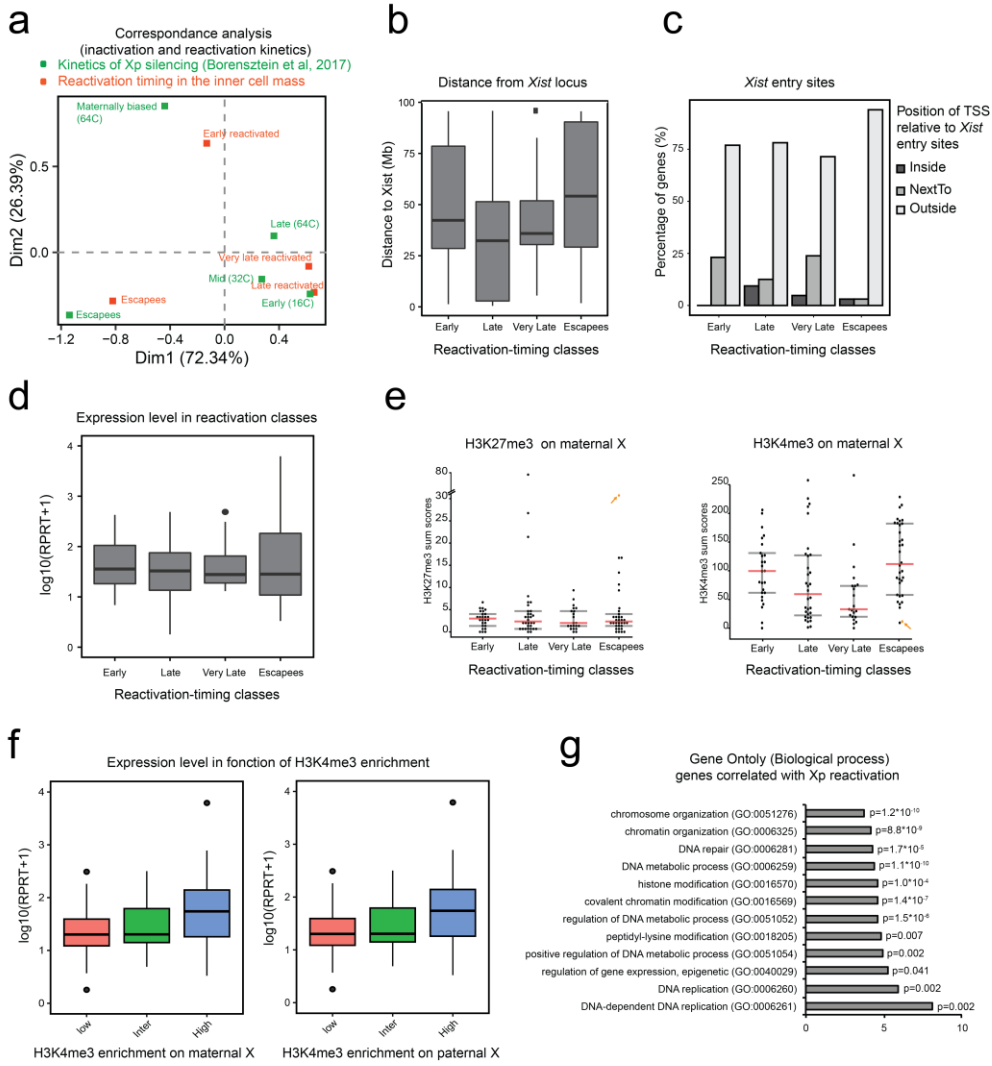

## Supplementary Figure 2 (related to Figure 4)

(a) Correspondence analysis (CA) of X-linked gene reactivation and silencing classes based on their timing of reactivation in ICM and timing of silencing during imprinted XCI in pre-implantation embryos as previously determined in Borensztein *et al*, 2017<sup>7</sup>.

(b) Distance to *Xist* genomic locus. Distribution of the genomic distances to *Xist* locus (in Mb) for the different X-linked gene reactivation classes. Transcription Start Site (TSS) of each gene has been used to measure the distance to *Xist* locus. Non-significant by Kruskal-Wallis test. Boxplot represent median with lower and upper quartiles.

(c) Percentage of X-linked genes from the different reactivation classes classified by their relative position to *Xist* “entry” sites (as identified during XCI induction in ESCs<sup>37</sup>: “inside” (TSS located in a *Xist* “entry” site), “next to” (TSS located less than 100 kb to an “entry” site) and “outside” (over 100 kb from an “entry” site). Non-significant by Kruskal-Wallis test.

(d) Expression level of X-linked genes in the different reactivation-timing classes in E3.5 ICM samples (mean of each single gene). No differences in expression level can be seen for early reactivated and escapees genes compared to late and very late genes. Boxplot represent median with lower and upper quartiles. Non-significant by Kruskal-Wallis test.

(e) Enrichment of H3K27me3 and H4K4me3 on maternal X obtained from (Zheng *et al*, 2016)<sup>38</sup>. Each dot represents a single gene. *Xist* dot is highlighted with an orange arrow. No differences can be seen for H3K27me3 distribution in any reactivation-timing groups (by Wilcoxon test), contrary to the paternal X (Figure 5b). Enrichment of H3K4me3 is much higher on maternal X chromosome compared to all paternal X (Figure 5b). Very late genes are significantly different compared to Early and Escapee groups for H3K4me3 maternal enrichment by Wilcoxon test (respectively  $p=3.61 \cdot 10^{-3}$  and  $p=1.71 \cdot 10^{-4}$ ).

(f) Expression level of X-linked genes in function of their enrichment of H3K4me3 on

maternal (left) and paternal (right) X chromosomes. Low, intermediate (Inter) and highly (High) enriched classes have been designed by H3K4me3 sum scores  $<5$ ,  $5 \leq$  and  $\geq 15$ , and  $>15$  respectively. On the maternal and paternal X chromosomes, lowly enriched genes for H3K4me3 marks are significantly less expressed than highly expressed ones (respectively  $p=0.028$  and  $p=0.045$ , by Dunn's test). Boxplot represent median with lower and upper quartiles.

**(g)** Representation of the Gene ontology analysis of Biological process performed on the best correlated genes with X-linked gene reactivation (q-value  $<0.05$ , Supplemental Table 3). The twelve best enrichment classes (based on fold enrichment) are represented with their p-value.

**a**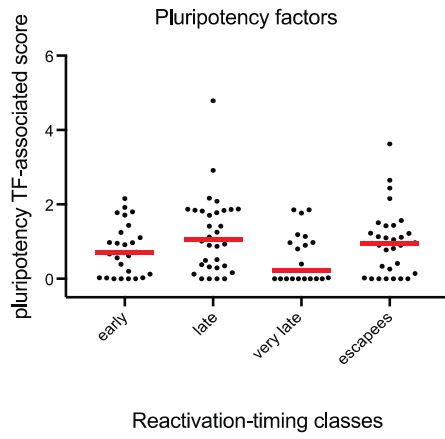**c**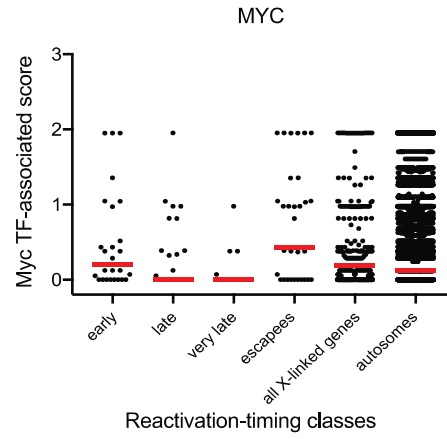**b**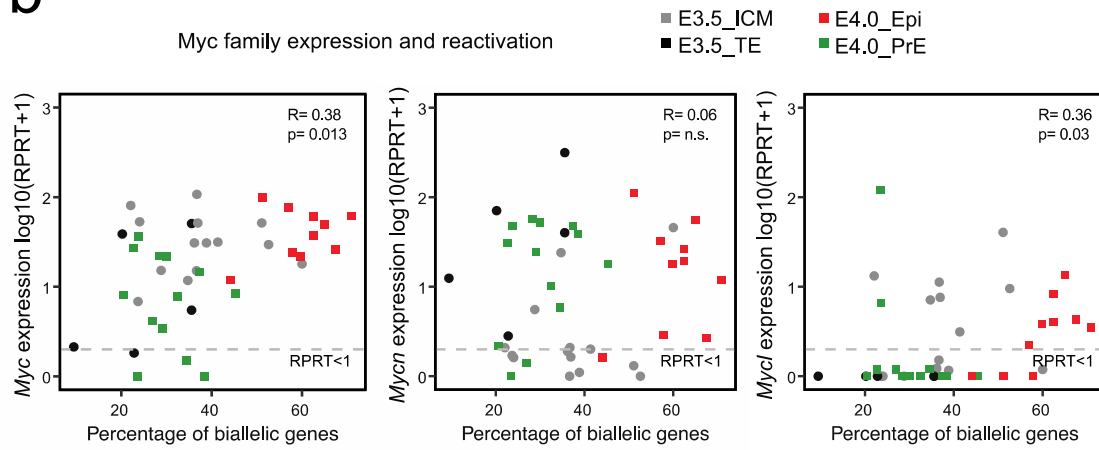

### Supplementary Figure 3 (related to Figure 4)

(a) The sum of TF-gene associated score of pluripotency factors (Nanog, Esrrb, Klf4, Oct4, Sox2, Tcfcp211) per gene and obtained from Chen et al., 2008<sup>40</sup>, is presented in each reactivation-timing groups (median in red). There is no significant difference between the groups according to Kruskal-Wallis test.

(b) The level of expression of *Myc* genes (*Myc*, *Mycn* and *Mycl*) is plotted in function of the number of biallelically/reactivated X-linked genes in each single cell. Different colours are applied for E3.5 trophectoderm (TE), E3.5 ICM, E4.0 Primitive endoderm (PrE) and E4.0 Epiblast (Epi) cells. By Spearman correlation, a positive correlation is seen between level of expression of *Myc* and *Mycl* and high percentage of biallelically expressed genes. Genes with level of expression as (RPRT<1) are considered as non-expressed in our samples.

(c) The sum of TF-gene associated score of *Myc* factors (*Myc* and *Mycn*) per gene and obtained from Chen et al., 2008<sup>40</sup>, is presented in each reactivation-timing groups, for all the X-linked genes and for all the autosomal genes (median in red). Late and very late reactivated genes are significantly depleted in *Myc*-associated score compared to the other classes,  $p < 0.0001$  by Kruskal-Wallis test, and are then potentially less responsive to *Myc* transcription factors than early-reactivated genes and escapees.

**a**

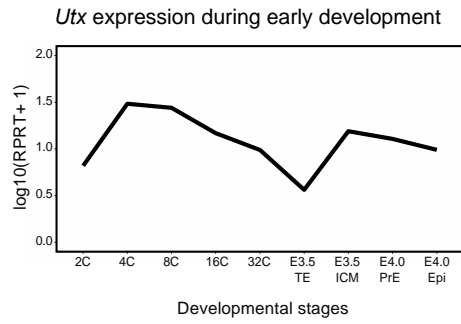

**b**

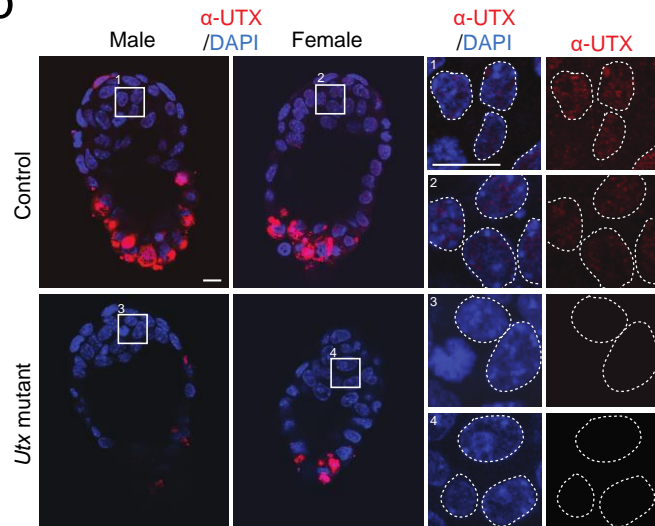

**c**

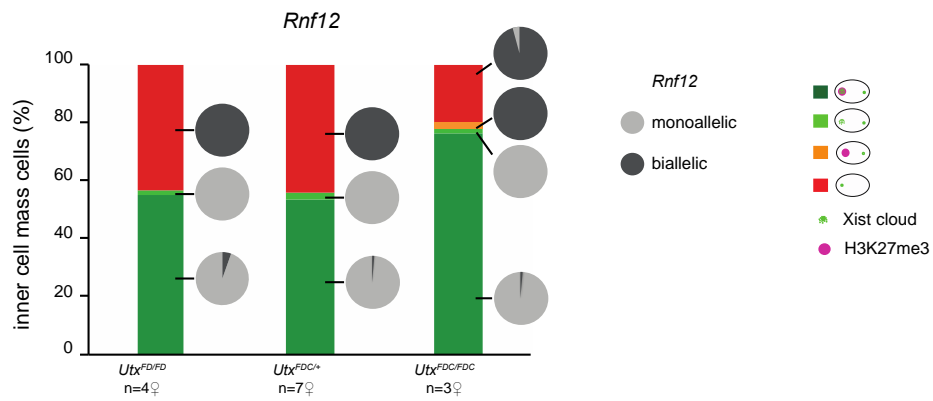

**d**

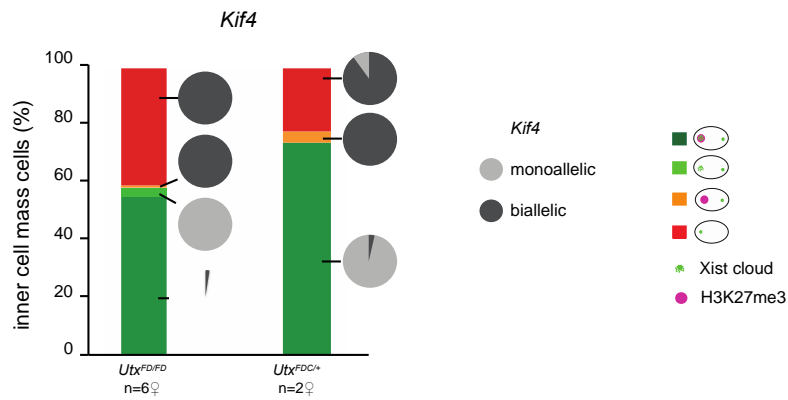



#### Supplementary Figure 4 (related to Figure 5)

(a) Level of expression of *Utx* gene during preimplantation mouse development (expression mean of all single cells). *Utx* is downregulated in trophectoderm but stay expressed in ICM cells at E3.5.

(b) Maximum intensity projection of 1.5  $\mu\text{m}$  section for control (*Utx*<sup>FD/FD</sup> female and *Utx*<sup>FD/Y</sup> male) and mutant (*Utx*<sup>FDC/FDC</sup> female and *Utx*<sup>FDC/Y</sup> male) E4.5 blastocysts analysed by immunofluorescence against UTX (red). DAPI is in dark blue. Enlarged nuclei are shown. Scale bars represent 10 $\mu\text{m}$ .

(c) Proportion (mean) of ICM cells showing enrichment of H3K27me3 on the Xist RNA coated X chromosome from E4.5 control (*Utx*<sup>FD/FD</sup>), heterozygous (*Utx*<sup>FDC/+</sup>) and mutant (*Utx*<sup>FDC/FDC</sup>) female blastocysts, linked with *Rnf12* allelic status.

(d) Proportion (mean) of ICM cells showing enrichment of H3K27me3 on the Xist RNA coated X chromosome) from E4.5 control (*Utx*<sup>FD/FD</sup>) and mutant (*Utx*<sup>FDC/FDC</sup>) female blastocysts, linked with *Kif4* allelic status.

Antibodies for Immunofluorescent analysis.

| Primary antibody                 | Dilution ratio | Company               | Cat. No.   | Species Reactivity in Product Data-sheet |
|----------------------------------|----------------|-----------------------|------------|------------------------------------------|
| Goat polyclonal anti-Human GATA6 | 1/200          | R&D                   | AF1700     | Human                                    |
| Rat monoclonal anti-Mouse Nanog  | 1/200          | eBioscience           | 14-5761-80 | Mouse                                    |
| Mouse monoclonal anti-Human UTX  | 1/200          | Abcam                 | ab184525   | Human                                    |
| Mouse monoclonal anti-H3K27me3   | 1/100          | Gift from D. Reinberg | 7B11       | Mouse                                    |
| Alexa 488 Donkey anti-mouse IgG  | 1/500          | Life Technologies     | A212020    | Mouse                                    |
| Alexa 647 Donkey anti-mouse IgG  | 1/500          | Life Technologies     | A31571     | Mouse                                    |
| Alexa 568 Donkey anti-goat IgG   | 1/500          | Life Technologies     | A11057     | Goat                                     |
| Alexa 488 Donkey anti-rat IgG    | 1/500          | Life Technologies     | A21208     | Rat                                      |

BAC Clone for RNA FISH probes

| Gene    | Clone ID    |
|---------|-------------|
| Abcb7   | RP24-274B9  |
| Atp6ap2 | RP23-43D10  |
| Atp7a   | RP23-186F4  |
| Atrx    | RP23-265D6  |
| Atrx    | WI1-2039P10 |
| Fmr1    | Rp24-183G11 |
| Kif4    | RP23-248G16 |
| Pdha1   | RP24-211E22 |
| Rnf12   | RP24-240J16 |

**Supplementary Table 1: List of RNA-FISH probes and antibodies**
